# Supplementary material for: Characteristics, Cryoprotection Evaluation and In Vitro Release of BSA-Loaded Chitosan Nanoparticles
Source: MDPI journal article supplement (doi:10.3390/md18060315), 2020-06-15
Supplement: s1 [file s1]

## Supplementary materials

**Table S1.** The Physicochemical Characteristics of CS-NPs prepared by using different concentration of the CS.

| C <sub>CS</sub> (mg/mL) | MHD $\pm$ SD (nm) | PDI  | $\zeta$ -pot $\pm$ SD (mv) | EE $\pm$ SD (%) | LC (%)       |
|-------------------------|-------------------|------|----------------------------|-----------------|--------------|
| 1                       | 90 $\pm$ 1        | 0.18 | 20 $\pm$ 1                 | 37 $\pm$ 1      | 59 $\pm$ 1   |
| 1.5                     | 101 $\pm$ 2       | 0.19 | 22 $\pm$ 1.5               | 41 $\pm$ 2      | 49 $\pm$ 1   |
| 2                       | 115 $\pm$ 1       | 0.19 | 20 $\pm$ 0.2               | 49 $\pm$ 0.2    | 30 $\pm$ 0.5 |
| 2.5                     | 123 $\pm$ 3       | 0.18 | 19 $\pm$ 1                 | 52 $\pm$ 1      | 24 $\pm$ 1   |
| 3                       | 128 $\pm$ 2       | 0.16 | 18 $\pm$ 1                 | 66 $\pm$ 1      | 24 $\pm$ 1   |

CS concentration = 1mg/ml.

Results were reported as mean  $\pm$  SD, n=3.

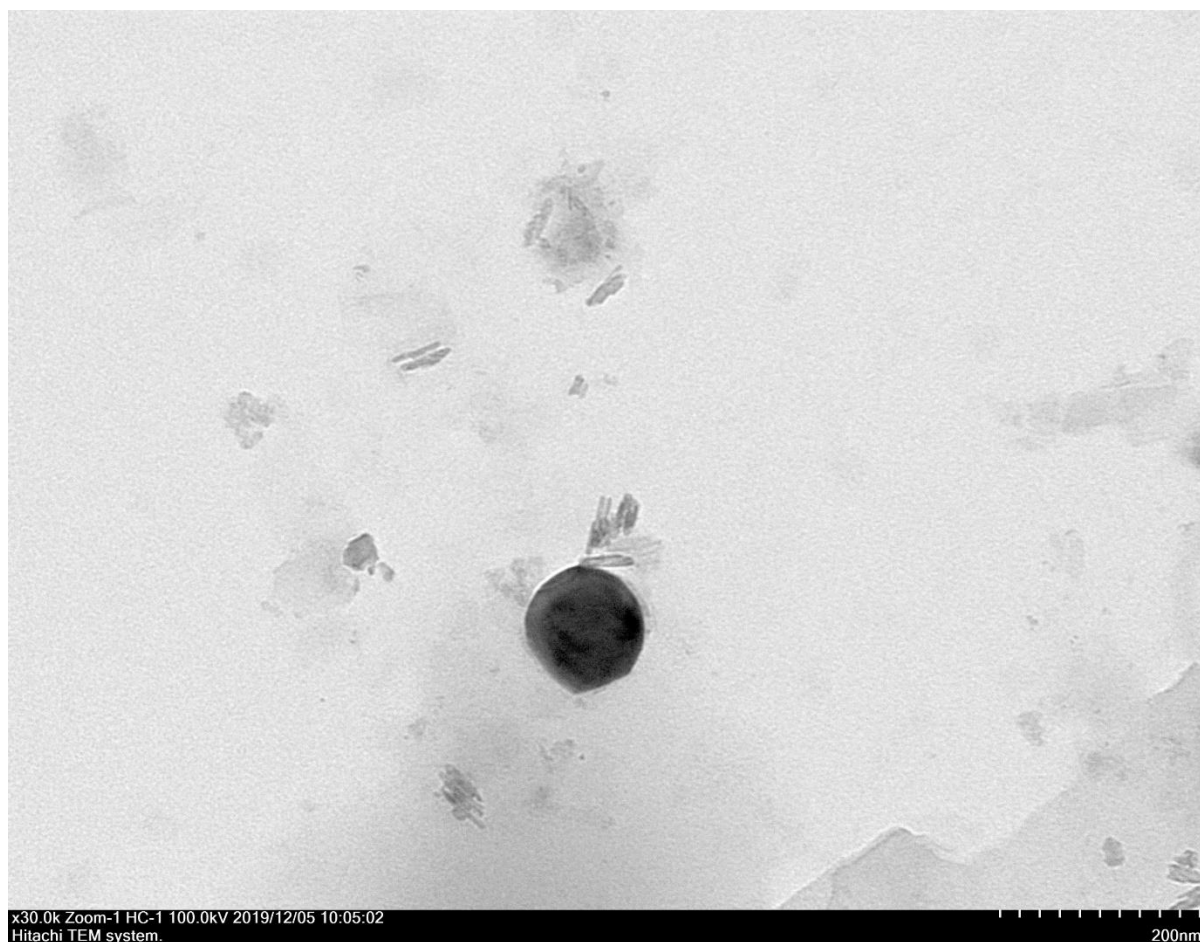

**Figure S1.** TEM image of BSA-loaded NPs.

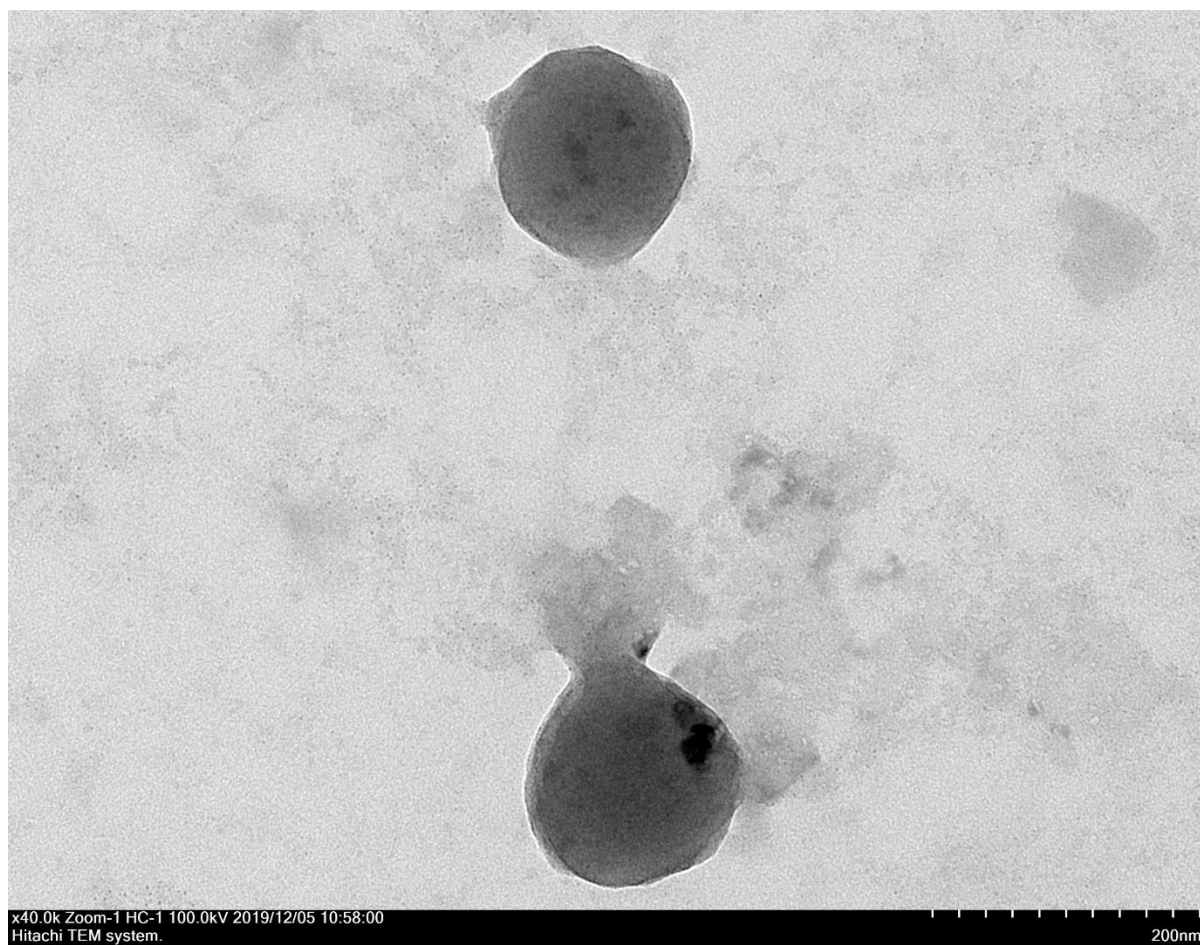

**Figure S2.** TEM image of re-dissolved BSA-loaded NPs.
